# Supplementary material for: Associations of Cigarettes Smoked Per Day with Biomarkers of Exposure Among U.S. Adult Cigarette Smokers in the Population Assessment of Tobacco and Health (PATH) Study Wave 1 (2013–2014)
Source: Oxford University Press journal article supplement (doi:10.1158/1055-9965.epi-19-0013), 2019-06-25
Supplement: 10559965epi190013-sup-214738_3_supp_5573537_pt96lg.xlsx [file 10559965epi190013-sup-214738_3_supp_5573537_pt96lg.xlsx]

## Sheet: Nicotine
Biomarker CPD	Exclusive cigarette smokers		Dual cigarette and e-cigarette users		Dual cigarette and smokeless tobacco users
	n	GM (95% CI)	n	GM (95% CI)	n	GM (95% CI)
Anabasine (µg/g creatinine)
Never tobacco users	88	0.61 (0.35, 1.05) * #	88	0.61 (0.35, 1.05) * #	88	0.61 (0.35, 1.05) * #
0-4	105	3.55 (2.79, 4.53)	24	2.35 (1.52, 3.64)	5	2.25 (0.42, 12.15) *
5-9	301	4.78 (4.03, 5.67)	83	5.79 (4.48, 7.49)	10	8.98 (3.77, 21.38)
10-14	472	9.34 (8.44, 10.34)	171	8.09 (6.92, 9.47)	27	11.42 (8.41, 15.52)
15-19	276	10.92 (9.41, 12.68)	112	11.41 (9.13, 14.26)	12	11.03 (5.13, 23.7)
20-24	559	12.78 (11.61, 14.06)	195	13.67 (11.67, 16)	38	10.58 (7.69, 14.55)
25-60	225	17.71 (14.98, 20.95)	60	18.25 (15.69, 21.24)	17	14.36 (9.31, 22.13)
All daily smokers	1938	9.66 (9.00, 10.38)	645	10.28 (9.36, 11.29)	109	10.66 (8.79, 12.94)
Anatabline (µg/g creatinine)
Never tobacco users	88	0.62 (0.31, 1.23) * #	88	0.62 (0.31, 1.23) * #	88	0.62 (0.31, 1.23) * #
0-4	105	5.28 (3.97, 7.01)	24	3.31 (2.02, 5.43)	5	2.45 (0.39, 15.43) *
5-9	301	7.45 (6.02, 9.22)	83	9.7 (7.27, 12.95)	10	16.49 (6.04, 45.06)
10-14	472	16.36 (14.72, 18.2)	172	13.78 (11.58, 16.41)	27	19.19 (14.56, 25.31)
15-19	276	19.06 (16.32, 22.27)	112	20.65 (16.16, 26.4)	12	20.3 (9.48, 43.47)
20-24	557	22.96 (20.77, 25.38)	195	25.26 (21.21, 30.08)	38	20.1 (14.41, 28.03)
25-60	225	32.6 (27.02, 39.34)	60	34.37 (29.04, 40.68)	17	25.7 (15.83, 41.72)
All daily smokers	1936	16.68 (15.36, 18.11)	646	18.22 (16.42, 20.22)	109	18.97 (15.21, 23.66)
Cotinine (µg/g creatinine)
Never tobacco users	1644	0.42 (0.36, 0.48) #	1644	0.42 (0.36, 0.48) #	1644	0.42 (0.36, 0.48) #
0-4	111	571.2 (307.17, 1062.17)	24	1232.15 (840.15, 1807.06)	6	306.02 (22.21, 4216.97)
5-9	305	1616.94 (1459.27, 1791.64)	83	2404.08 (2033.21, 2842.59)	10	2984.97 (1433.85, 6214.07)
10-14	474	3180.71 (2887.8, 3503.32)	172	3023.78 (2705.94, 3378.97)	27	4053.12 (3418.39, 4805.71)
15-19	276	3830.59 (3417.5, 4293.61)	112	3851.84 (3294.55, 4503.39)	12	5417.19 (3596.93, 8158.6)
20-24	560	3976.7 (3702.43, 4271.3)	197	4485.5 (3825.8, 5258.95)	38	3688.15 (2846.23, 4779.11)
25-60	226	5194.68 (4587.06, 5882.78)	60	5442.49 (4682.19, 6326.25)	17	4555.18 (3220.69, 6442.63)
All daily smokers	1952	3008.25 (2804.17, 3227.18)	648	3613.93 (3342.72, 3907.15)	110	3572.81 (2827.11, 4515.19)
Cotinine N-oxide (µg/g creatinine)
Never tobacco users	88	13.86 (6.86, 28.03)	88	13.86 (6.86, 28.03)	88	13.86 (6.86, 28.03)
0-4	105	124.18 (94.97, 162.38)	24	138.38 (91.6, 209.05)	5	117.71 (27.58, 502.34)
5-9	301	224.15 (199.56, 251.78)	83	281.25 (232.75, 339.84)	10	338.65 (169.83, 675.31)
10-14	472	361.68 (331.44, 394.68)	172	334.72 (296.98, 377.26)	27	471.86 (391.68, 568.46)
15-19	276	415.47 (378.71, 455.8)	112	430.16 (381.2, 485.42)	12	500.68 (357.84, 700.52)
20-24	559	468.11 (424.46, 516.26)	195	502.7 (456.31, 553.8)	38	380.31 (323.85, 446.61)
25-60	225	545.56 (501.48, 593.51)	60	563.36 (498.86, 636.19)	17	453.61 (301, 683.6)
All daily smokers	1938	366.19 (345.21, 388.45)	646	402.09 (376.94, 428.91)	109	406.36 (356.18, 463.61)
Trans-3'-hydroxycotinine (µg/g creatinine)
Never tobacco users	1641	0.69 (0.59, 0.80)	1641	0.69 (0.59, 0.80)	1641	0.69 (0.59, 0.80)
0-4	110	1082.81 (636.15, 1843.08)	24	1762.2 (1066.99, 2910.40)	6	625.31 (82.43, 4743.42)
5-9	305	2956.56 (2446.53, 3572.91)	83	3849.18 (3152.91, 4699.21)	10	5904.43 (2325.92, 14988.64)
10-14	474	5366.27 (4865.20, 5918.95)	172	5128.79 (4528.90, 5808.13)	27	6094.03 (4715.52, 7875.51)
15-19	276	5726.14 (4984.93, 6577.56)	112	6366.47 (5458.40, 7425.61)	12	7254.81 (5073.74, 10373.48)
20-24	560	7121.05 (6322.91, 8019.94)	197	8154 (7062.86, 9413.71)	38	5372.85 (4331.55, 6664.49)
25-60	226	8710.11 (7506.24, 10107.06)	60	10257.29 (8830.01, 11915.26)	17	7840.82 (5031.55, 12218.59)
All daily smokers	1951	5174.5 (4749.12, 5637.98)	648	6231.88 (5750.06, 6754.08)	110	5538.14 (4668.14, 6570.28)
Nicotine (µg/g creatinine)
Never tobacco users	88	31.30 (12.32, 79.51) #	88	31.30 (12.32, 79.51) #	88	31.30 (12.32, 79.51) #
0-4	105	379.01 (279.85, 513.30)	24	332.72 (202.57, 546.50)	5	213.69 (46.45, 983.06)
5-9	301	647.84 (502.01, 836.04)	83	1003.78 (764.42, 1318.09)	10	1135.41 (463.05, 2784.05)
10-14	472	1409.64 (1248.68, 1591.36)	172	1253.34 (1033.99, 1519.22)	27	1585.69 (1148.51, 2189.30)
15-19	276	1734.57 (1398.00, 2152.17)	112	1618.98 (1260.98, 2078.61)	12	1436.13 (669.95, 3078.55)
20-24	558	1928.36 (1703.44, 2182.97)	195	2285.97 (1828.71, 2857.56)	38	1499.37 (877.87, 2560.86)
25-60	224	2944.3 (2484.98, 3488.52)	60	2980.86 (2417.55, 3675.44)	17	1938.19 (1217.11, 3086.49)
All daily smokers	1936	1435.15 (1307.85, 1574.85)	646	1631.25 (1445.23, 1841.22)	109	1445.14 (1086.56, 1922.06)
Norcotinine (µg/g creatinine)
Never tobacco users	88	4.27 (2.27, 8.02)	88	4.27 (2.27, 8.02)	88	4.27 (2.27, 8.02)
0-4	105	41.46 (34.25, 50.18)	24	34.93 (22.02, 55.39)	5	37.23 (12.38, 112)
5-9	301	64.06 (57.26, 71.68)	83	79.12 (65.88, 95.03)	10	99.48 (44.12, 224.3)
10-14	472	111.01 (101.91, 120.93)	172	94.05 (83.65, 105.73)	27	114.96 (91.45, 144.51)
15-19	276	126.19 (114.3, 139.31)	112	124.29 (106.98, 144.41)	12	138.60 (94.55, 203.17)
20-24	559	142.02 (129.38, 155.9)	195	153.83 (137.61, 171.97)	38	108.62 (93.86, 125.71)
25-60	225	173.09 (156.75, 191.14)	60	176.64 (157.95, 197.54)	17	138.63 (96.15, 199.86)
All daily smokers	1938	111.50 (105.97, 117.33)	646	117.66 (109.93, 125.94)	109	112.88 (98.93, 128.79)
Nornicotine (µg/g creatinine)
Never tobacco users	88	3.39 (1.85, 6.22) #	88	3.39 (1.85, 6.22) #	88	3.39 (1.85, 6.22) #
0-4	105	24.95 (19.38, 32.12)	24	20.67 (13.19, 32.40)	5	14.54 (2.76, 76.69) *
5-9	300	40.31 (35.43, 45.86)	83	51.18 (41.32, 63.39)	10	70.83 (32.48, 154.47)
10-14	471	74.05 (67.46, 81.28)	172	64.55 (55.83, 74.63)	27	82.28 (68.54, 98.77)
15-19	275	84.88 (73.10, 98.55)	112	86.68 (72.11, 104.18)	12	80.48 (47.21, 137.2)
20-24	557	96.84 (88.98, 105.39)	195	106.97 (92.84, 123.25)	38	81.5 (64.66, 102.74)
25-60	223	133.66 (119.17, 149.91)	60	137.91 (123.10, 154.50)	17	100.77 (67.11, 151.31)
All daily smokers	1931	75.4 (70.92, 80.17)	646	81.51 (74.64, 89.02)	109	78.74 (66.97, 92.58)
Nicotine N-oxide (µg/g creatinine)
Never tobacco users	88	11.50 (4.25, 31.15)	88	11.50 (4.25, 31.15)	88	11.50 (4.25, 31.15)
0-4	105	147.57 (111.01, 196.18)	24	124.82 (67.47, 230.90)	5	102.06 (14.24, 731.19)
5-9	301	244.03 (202.39, 294.23)	83	340.62 (267.77, 433.31)	10	399.49 (224.35, 711.39)
10-14	472	439.34 (389.37, 495.72)	172	365.45 (303.95, 439.4)	27	577.46 (492.47, 677.11)
15-19	276	513.95 (425.21, 621.22)	112	529.25 (452.93, 618.43)	12	489.85 (269.91, 889.00)
20-24	559	529.97 (481.56, 583.24)	195	595.30 (524.19, 676.04)	38	474.70 (375.32, 600.40)
25-60	225	646.75 (585.57, 714.33)	60	620.67 (521.72, 738.39)	17	443.56 (300.29, 655.20)
All daily smokers	1938	427.62 (400.93, 456.09)	646	464.12 (423.24, 508.95)	109	464.31 (394.32, 546.73)
TNE-2 (µmol/g creatinine)
Never tobacco users	1633	0.01 (0.01, 0.01)	1633	0.01 (0.01, 0.01)	1633	0.01 (0.01, 0.01)
0-4	110	9.88 (5.82, 16.78)	24	16.91 (11.01, 25.96)	6	5.30 (0.59, 47.78) *
5-9	305	26.43 (23.23, 30.07)	83	35.62 (30.23, 41.97)	10	48.47 (20.72, 113.38)
10-14	474	47.98 (44.14, 52.16)	172	46.46 (41.85, 51.57)	27	56.22 (46.37, 68.18)
15-19	276	53.56 (47.95, 59.83)	112	57.52 (50.12, 66.02)	12	69.89 (48.43, 100.88)
20-24	560	62.54 (57.12, 68.48)	197	70.23 (61.05, 80.80)	38	52.13 (43.67, 62.23)
25-60	226	78.11 (69.12, 88.26)	60	87.70 (77.53, 99.22)	17	68.40 (46.40, 100.82)
All daily smokers	1951	46.42 (43.22, 49.85)	648	55.43 (51.52, 59.63)	110	51.20 (42.72, 61.36)
TNE-7 (µmol/g creatinine)
Never tobacco users	88	2.15 (1.03, 4.51) *	88	2.15 (1.03, 4.51) *	88	2.15 (1.03, 4.51) *
0-4	105	21.80 (17.17, 27.68)	24	22.34 (15.05, 33.17)	5	23.09 (7.56, 70.53)
5-9	300	38.09 (34.00, 42.68)	83	50.02 (42.84, 58.40)	10	62.46 (27.48, 141.98)
10-14	471	66.29 (61.70, 71.23)	172	62.40 (55.91, 69.65)	27	76.84 (65.79, 89.74)
15-19	275	74.84 (67.94, 82.44)	112	78.88 (68.57, 90.75)	12	88.81 (58.27, 135.37)
20-24	556	86.74 (79.90, 94.15)	195	101.38 (90.02, 114.18)	38	71.45 (58.34, 87.51)
25-60	222	113.46 (103.71, 124.12)	60	119.35 (107.36, 132.67)	17	89.73 (60.74, 132.57)
All daily smokers	1929	67.37 (63.70, 71.26)	646	76.89 (71.73, 82.42)	109	73.74 (63.29, 85.92)
Cotinine (serum) (ng/mL)
Never tobacco users	970	0.03 (0.02, 0.03) #	970	0.03 (0.02, 0.03) #	970	0.03 (0.02, 0.03) #
0-4	75	27.87 (8.61, 90.19)	13	54.21 (21.66, 135.67)	5	12.03 (0.15, 957.84) *
5-9	208	129.09 (108.42, 153.7)	57	152.7 (123.74, 188.44)	6	358.02 (146.83, 872.97)
10-14	303	222.18 (201.97, 244.41)	123	197.44 (176.73, 220.58)	19	270.65 (209.36, 349.88)
15-19	180	250.6 (230.74, 272.16)	78	236.73 (208.70, 268.53)	10	279.66 (185.46, 421.70)
20-24	393	248.8 (222.88, 277.74)	127	276.39 (254.91, 299.69)	23	328.97 (298.97, 361.97)
25-60	157	285.41 (257.46, 316.38)	41	310.28 (276.89, 347.69)	12	340.92 (261.41, 444.63)
All daily smokers	1316	197.06 (178.58, 217.44)	439	221.36 (206.76, 237.00)	75	255.74 (179.46, 364.45)
Trans-3'-Hydroxycotine (serum) (ng/mL)
Never tobacco users	970	0.02 (0.02, 0.02) #	970	0.02 (0.02, 0.02) #	970	0.02 (0.02, 0.02) #
0-4	75	10.03 (3.38, 29.84)	13	15.5 (6.31, 38.08)	5	7.58 (0.20, 290.58) *
5-9	208	44.52 (34.43, 57.56)	57	53.87 (41.99, 69.11)	6	164.32 (48.65, 554.96)
10-14	303	82.11 (74.67, 90.29)	123	71.79 (61.24, 84.16)	19	106.42 (84.57, 133.92)
15-19	180	86.09 (75.12, 98.66)	78	97.29 (84.25, 112.36)	10	96.57 (67.41, 138.35)
20-24	393	104.47 (90.27, 120.89)	127	113.27 (99.78, 128.58)	23	106.54 (84.34, 134.59)
25-60	157	122.26 (106.73, 140.05)	41	143.48 (119.49, 172.29)	12	152.08 (89.95, 257.10)
All daily smokers	1316	75.30 (67.48, 84.03)	439	86.51 (78.88, 94.89)	75	97.65 (75.24, 126.73)
* - Relative standard error > 30%
# - More than 40% of values were below the Limit of Detection

## Sheet: TSNAs
Biomarker CPD	Exclusive cigarette smokers		Dual cigarette and e-cigarette users		Dual cigarette and smokeless tobacco users
	n	GM (95% CI)	n	GM (95% CI)	n	GM (95% CI)
NAB (ng/g creatinine)
Never tobacco users	1655	1.07 (1.00, 1.14) * #	1655	1.07 (1.00, 1.14) * #	1655	1.07 (1.00, 1.14) * #
0-4	111	6.11 (4.59, 8.14)	24	7.48 (5.06, 11.06)	6	4.24 (1.09, 16.51) *
5-9	303	8.71 (6.83, 11.1)	83	14.59 (11.23, 18.96)	10	29.35 (10.62, 81.08)
10-14	471	21.87 (19.29, 24.79)	171	20.19 (16.38, 24.9)	27	31.12 (24.1, 40.19)
15-19	275	28.69 (24.32, 33.83)	111	32.50 (26.76, 39.48)	11	75.35 (33.77, 168.12)
20-24	558	28.76 (25.01, 33.07)	197	35.82 (30.07, 42.68)	38	30.51 (18.48, 50.37)
25-60	225	39.39 (33.91, 45.75)	60	40.96 (32.43, 51.74)	17	39.41 (25.89, 59.98)
All daily smokers	1943	21.23 (19.37, 23.28)	646	26.62 (23.87, 29.68)	109	31.90 (23.49, 43.33)
NAT (ng/g creatinine)
Never tobacco users	1648	2.92 (2.74, 3.11) #	1648	2.92 (2.74, 3.11) #	1648	2.92 (2.74, 3.11) #
0-4	111	31.63 (22.60, 44.26)	24	37.69 (22.07, 64.35)	6	25.68 (3.92, 168.25)
5-9	304	55.55 (45.10, 68.43)	82	91.42 (67.91, 123.07)	10	248.72 (74.75, 827.61)
10-14	470	146.10 (127.34, 167.63)	168	128.78 (103.92, 159.58)	27	221.23 (165.53, 295.69)
15-19	272	193.49 (162.44, 230.49)	108	217.42 (174.75, 270.50)	12	538.90 (216.24, 1342.99)
20-24	549	196.59 (168.87, 228.86)	195	234.21 (197.55, 277.68)	38	228.89 (134.88, 388.41)
25-60	221	277.29 (230.68, 333.32)	57	268.74 (208.35, 346.64)	17	287.61 (174.13, 475.03)
All daily smokers	1927	140.14 (127.68, 153.80)	634	171.54 (153.42, 191.81)	110	235.49 (168.74, 328.64)
NNAL (ng/g creatinine)
Never tobacco users	1653	0.92 (0.82, 1.04) * #	1653	0.92 (0.82, 1.04) * #	1653	0.92 (0.82, 1.04) * #
0-4	111	67.24 (45.76, 98.80)	24	75.73 (46.22, 124.07)	6	202.84 (65.72, 626.09)
5-9	304	155.26 (133.54, 180.50)	83	204.14 (160.74, 259.25)	10	481.67 (165.73, 1399.95)
10-14	474	295.76 (267.15, 327.43)	172	276.26 (239.83, 318.24)	27	399.45 (311.63, 512.03)
15-19	276	343.03 (309.39, 380.33)	111	397.63 (325.43, 485.84)	12	602.12 (321.04, 1129.29)
20-24	560	405.17 (372.37, 440.85)	196	435.39 (380.30, 498.47)	38	431.48 (330.57, 563.20)
25-60	226	582.55 (492.78, 688.68)	60	622.59 (534.86, 724.7)	17	631.52 (429.53, 928.49)
All daily smokers	1951	298.01 (275.37, 322.50)	646	345.24 (318.60, 374.11)	110	453.88 (383.26, 537.51)
NNN (ng/g creatinine)
Never tobacco users	1647	1.92 (1.81, 2.04) #	1647	1.92 (1.81, 2.04) #	1647	1.92 (1.81, 2.04) #
0-4	108	4.58 (3.36, 6.26)	24	3.2 (2.04, 5.02) #	6	3.81 (1.25, 11.66) * #
5-9	292	8.43 (7.07, 10.07)	81	9.21 (6.41, 13.23)	10	12.4 (5.24, 29.31)
10-14	459	14.84 (12.95, 17.01)	167	10.98 (9.00, 13.39)	26	17.24 (13.68, 21.74)
15-19	266	18.75 (14.49, 24.26)	110	16.25 (13.46, 19.61)	12	26.22 (11.99, 57.36)
20-24	523	18.58 (16.9, 20.41)	190	17.58 (14.14, 21.86)	38	21.46 (13.62, 33.83)
25-60	214	24.23 (20.9, 28.10)	59	23.94 (20.14, 28.45)	17	22.7 (12.50, 41.22)
All daily smokers	1862	14.89 (13.81, 16.06)	631	14.05 (12.66, 15.59)	109	18.6 (14.57, 23.74)
* - Relative standard error > 30%
# - More than 40% of values were below the Limit of Detection

## Sheet: PAHs
Biomarker CPD	Exclusive cigarette smokers		Dual cigarette and e-cigarette users		Dual cigarette and smokeless tobacco users
	n	GM (95% CI)	n	GM (95% CI)	n	GM (95% CI)
1-Naphthol (ng/g creatinine)
Never tobacco users	1649	1.40 (1.28, 1.53)	1649	1.40 (1.28, 1.53)	1649	1.40 (1.28, 1.53)
0-4	111	5.61 (4.28, 7.36)	24	4.72 (2.89, 7.72)	6	1.26 (0.54, 2.95) *
5-9	305	8.29 (6.93, 9.91)	83	10.26 (8, 13.16)	10	11.18 (5.42, 23.04)
10-14	474	12.67 (11.42, 14.07)	171	11.91 (10.37, 13.68)	27	11.66 (9.44, 14.4)
15-19	276	17.03 (12.69, 22.84)	112	21.52 (13.78, 33.59)	12	10.66 (8.92, 12.75)
20-24	560	17.94 (16.19, 19.87)	197	20.45 (17.24, 24.25)	38	10.18 (7.92, 13.07)
25-60	226	29.07 (21.77, 38.82)	60	25.47 (20.8, 31.19)	17	15.31 (9.48, 24.71)
All daily smokers	1952	14.46 (13.30, 15.73)	647	16.34 (14.53, 18.36)	110	10.29 (8.80, 12.04)
2-Naphthol (ng/g creatinine)
Never tobacco users	1652	4.63 (4.34, 4.94)	1652	4.63 (4.34, 4.94)	1652	4.63 (4.34, 4.94)
0-4	111	8.33 (6.85, 10.14)	24	7.88 (6.13, 10.14)	6	3.52 (1.78, 6.97)
5-9	305	12.35 (10.85, 14.07)	83	12.47 (10.87, 14.3)	10	14.91 (7.75, 28.7)
10-14	474	14.49 (13.45, 15.61)	171	13.57 (12.62, 14.60)	27	13.77 (11.43, 16.58)
15-19	276	17.43 (15.33, 19.81)	112	16.89 (14.83, 19.23)	12	14.24 (12.07, 16.8)
20-24	560	18.36 (17.27, 19.53)	197	19.34 (17.78, 21.04)	38	12.66 (10.93, 14.66)
25-60	226	22.64 (20.91, 24.50)	60	23.32 (20.63, 26.35)	17	16.59 (11.39, 24.17)
All daily smokers	1952	15.91 (15.25, 16.60)	647	16.31 (15.53, 17.13)	110	13.02 (11.75, 14.42)
3-Hydroxyfluorene (ng/g creatinine)
Never tobacco users	1655	63.97 (60.32, 67.85)	1655	63.97 (60.32, 67.85)	1655	63.97 (60.32, 67.85)
0-4	111	301.67 (239.29, 380.32)	24	252.55 (180.34, 353.67)	6	105.49 (61.48, 180.98)
5-9	305	458.39 (406.19, 517.29)	83	535.13 (442.75, 646.79)	10	502.19 (238.84, 1055.9)
10-14	474	665.05 (609.06, 726.2)	172	608.35 (547.37, 676.14)	27	683.6 (433.74, 1077.38)
15-19	276	807.86 (726.52, 898.32)	112	831.36 (730.96, 945.54)	12	575.41 (513.52, 644.75)
20-24	560	874.45 (799.14, 956.86)	197	916.86 (821.10, 1023.77)	38	587.49 (475.46, 725.91)
25-60	226	1119.79 (1012.23, 1238.78)	60	1142.96 (1007.14, 1297.11)	17	868.42 (576.41, 1308.35)
All daily smokers	1952	710.81 (676.72, 746.60)	648	752.98 (704.01, 805.35)	110	589.92 (514.29, 676.68)
2-Hydroxyfluorene (ng/g creatinine)
Never tobacco users	1655	167.2 (158.05, 176.88)	1655	167.2 (158.05, 176.88)	1655	167.20 (158.05, 176.88)
0-4	111	536.81 (452.87, 636.31)	24	449.24 (329.64, 612.23)	6	231.41 (170.69, 313.74)
5-9	305	834.00 (743.00, 936.13)	83	877.41 (736.63, 1045.10)	10	1011.39 (534.33, 1914.39)
10-14	474	1134.92 (1047.54, 1229.59)	172	1113.77 (1009.56, 1228.73)	27	1252.91 (758.39, 2069.91)
15-19	276	1377.47 (1229.28, 1543.53)	112	1409.11 (1237.47, 1604.56)	12	1145.81 (1028.41, 1276.62)
20-24	560	1469.89 (1359.39, 1589.38)	197	1632.80 (1481.08, 1800.06)	38	1013.46 (825.23, 1244.63)
25-60	226	2008.64 (1827.04, 2208.30)	60	2104.13 (1871.03, 2366.27)	17	1386.77 (964.98, 1992.93)
All daily smokers	1952	1231.23 (1173.36, 1291.97)	648	1329.39 (1249.40, 1414.50)	110	1061.43 (925.93, 1216.76)
1-Hydroxyphenanthrene (ng/g creatinine)
Never tobacco users	1655	106.27 (101.08, 111.72)	1655	106.27 (101.08, 111.72)	1655	106.27 (101.08, 111.72)
0-4	111	121.15 (97.24, 150.94)	24	109.28 (83.57, 142.91)	6	76.69 (41.20, 142.76)
5-9	305	140.93 (125.28, 158.53)	83	172.72 (146.25, 203.98)	10	188.21 (96.98, 365.24)
10-14	474	184.99 (170.56, 200.63)	172	180.61 (165.99, 196.53)	27	189.96 (110.32, 327.08)
15-19	276	206.98 (184.19, 232.59)	112	231.32 (202.06, 264.81)	12	162.31 (137.92, 191.02)
20-24	560	212.86 (200.25, 226.26)	197	244.99 (225.75, 265.86)	38	140.68 (109.68, 180.43)
25-60	226	283.71 (252.44, 318.85)	60	290.57 (254.05, 332.34)	17	228.92 (151.14, 346.74)
All daily smokers	1952	192.95 (184.19, 202.12)	648	214.56 (203.62, 226.10)	110	165.03 (141.58, 192.36)
2- and 3-Hydroxyphenanthrene (ng/g creatinine)
Never tobacco users	1655	129.09 (123.14, 135.33)	1655	129.09 (123.14, 135.33)	1655	129.09 (123.14, 135.33)
0-4	111	203.32 (170.1, 243.03)	24	158.38 (126.76, 197.88)	6	142.31 (83.01, 243.96)
5-9	305	241.23 (211.32, 275.38)	83	278.74 (227.98, 340.81)	10	347.81 (187.69, 644.53)
10-14	474	324.74 (298.93, 352.79)	172	292.05 (267.06, 319.38)	27	357.4 (203.04, 629.09)
15-19	276	362.03 (323.67, 404.94)	112	351.47 (307.92, 401.17)	12	304.45 (253.45, 365.7)
20-24	560	371.15 (349.35, 394.30)	197	403.82 (364.93, 446.85)	38	285.53 (223.58, 364.64)
25-60	226	531.44 (456.89, 618.16)	60	494.41 (423.23, 577.55)	17	438.49 (278.95, 689.27)
All daily smokers	1952	338.42 (321.86, 355.84)	648	345.79 (325.36, 367.50)	110	319.25 (274.91, 370.74)
1-Pyrene (ng/g creatinine)
Never tobacco users	1655	128.13 (120.68, 136.04)	1655	128.13 (120.68, 136.04)	1655	128.13 (120.68, 136.04)
0-4	111	203.61 (171.86, 241.22)	24	193.08 (158.38, 235.39)	6	137.76 (93.07, 203.91)
5-9	305	237.27 (215.70, 261.00)	83	335.98 (279.59, 403.74)	10	418.41 (250.83, 697.98)
10-14	474	326.84 (297.15, 359.50)	172	332.93 (301.22, 367.98)	27	412.34 (227.26, 748.15)
15-19	276	376.63 (316.09, 448.76)	112	396.3 (344.40, 456.04)	12	280.12 (231.86, 338.41)
20-24	560	370.95 (341.65, 402.76)	197	441.09 (408.32, 476.49)	38	283.1 (209.87, 381.90)
25-60	226	482.01 (424.41, 547.43)	60	559.97 (464.29, 675.38)	17	450.72 (275.64, 737)
All daily smokers	1952	335.76 (318.11, 354.40)	648	391.17 (370.99, 412.44)	110	332 (278.16, 396.25)
* - Relative standard error > 30%

## Sheet: VOCs
Biomarker CPD	Exclusive cigarette smokers		Dual cigarette and e-cigarette users		Dual cigarette and smokeless tobacco users
	n	GM (95% CI)	n	GM (95% CI)	n	GM (95% CI)
N-Acetyl-S-(2-carbamoylethyl)-L-cysteine (AAMA) (µg/g creatinine)
Never tobacco users	1645	45.30 (43.12, 47.59)	1645	45.30 (43.12, 47.59)	1645	45.30 (43.12, 47.59)
0-4	111	95.64 (81.30, 112.52)	24	89.94 (71.23, 113.57)	6	57.82 (35.65, 93.78)
5-9	301	111.02 (103.07, 119.57)	83	132.38 (116.94, 149.86)	10	114.32 (72.39, 180.53)
10-14	468	145.73 (135.34, 156.93)	169	141.29 (128.01, 155.96)	26	120.95 (95.23, 153.63)
15-19	275	169.14 (141.34, 202.41)	112	160.12 (139.53, 183.74)	12	143.36 (100.95, 203.59)
20-24	556	168.87 (159.22, 179.12)	196	181.21 (164.74, 199.31)	37	128.43 (102.99, 160.14)
25-60	225	196.52 (179.28, 215.43)	60	206.39 (180.63, 235.83)	17	167.82 (106.13, 265.37)
All daily smokers	1936	150.71 (144.57, 157.12)	644	159.53 (150.10, 169.56)	108	127.62 (110.99, 146.75)
AMC N-Acetyl-S-(N-methylcarbamoyl)-L-cysteine (AMCA) (µg/g creatinine)
Never tobacco users	1653	104.26 (98.33, 110.54)	1653	104.26 (98.33, 110.54)	1653	104.26 (98.33, 110.54)
0-4	110	261.27 (222.90, 306.25)	24	251.08 (198.77, 317.17)	6	140.76 (100.57, 197.00)
5-9	298	368.39 (333.08, 407.45)	83	407.05 (347.35, 477.00)	10	396.81 (199.54, 789.10)
10-14	466	542.95 (499.55, 590.12)	171	519.59 (472.94, 570.85)	26	501.63 (436.13, 576.97)
15-19	275	605.23 (517.24, 708.19)	112	687.64 (599.39, 788.89)	12	532.58 (477.31, 594.25)
20-24	556	703.70 (651.07, 760.58)	196	782.23 (701.77, 871.92)	38	453.84 (381.47, 539.94)
25-60	219	878.15 (795.90, 968.90)	60	1069.55 (964.47, 1186.08)	17	553.57 (376.83, 813.20)
All daily smokers	1924	568.16 (539.41, 598.45)	646	638.96 (600.54, 679.85)	109	457.84 (407.11, 514.89)
N-Acetyl-S-(benzyl)-L-cysteine (BMA) (µg/g creatinine)
Never tobacco users	1653	6.12 (5.78, 6.49)	1653	6.12 (5.78, 6.49)	1653	6.12 (5.78, 6.49)
0-4	111	6.13 (4.13, 9.10)	24	7.52 (5.78, 9.78)	6	5.46 (2.86, 10.43)
5-9	303	5.81 (5.27, 6.41)	82	7.77 (6.24, 9.67)	9	7.04 (4.55, 10.88)
10-14	467	7.35 (6.52, 8.29)	172	7.17 (6.01, 8.54)	25	5.08 (3.69, 6.98)
15-19	276	7.05 (5.78, 8.60)	112	6.43 (5.36, 7.72)	12	5.10 (4.12, 6.32)
20-24	560	6.54 (5.65, 7.58)	197	7.45 (6.66, 8.34)	37	4.80 (3.73, 6.18)
25-60	225	6.00 (5.39, 6.69)	60	7.99 (6.01, 10.63)	17	6.61 (4.06, 10.75)
All daily smokers	1942	6.56 (6.09, 7.06)	647	7.27 (6.68, 7.92)	106	5.34 (4.53, 6.29)
N-Acetyl-S-(2-carboxyethyl)-L-cysteine (CEMA) (µg/g creatinine)
Never tobacco users	1599	93.95 (89.66, 98.45)	1599	93.95 (89.66, 98.45)	1599	93.95 (89.66, 98.45)
0-4	108	209.93 (175.33, 251.35)	23	160.36 (125.48, 204.94)	5	80.23 (46.08, 139.70)
5-9	284	202.75 (176.18, 233.32)	80	236.36 (197.76, 282.51)	10	221.51 (148.25, 330.97)
10-14	451	294.55 (266.02, 326.14)	165	273.16 (248.04, 300.82)	25	247.87 (198.80, 309.05)
15-19	262	318.42 (285.86, 354.70)	106	352.51 (305.54, 406.70)	12	297.49 (219.99, 402.27)
20-24	523	366.25 (330.37, 406.03)	189	432.91 (388.18, 482.79)	37	244.35 (202.72, 294.55)
25-60	206	459.93 (402.36, 525.75)	59	510.11 (452.13, 575.54)	16	294.76 (203.96, 425.99)
All daily smokers	1834	308.84 (292.18, 326.45)	622	342.24 (319.84, 366.21)	105	246.71 (212.77, 286.06)
N-Acetyl-S-(1-cyano-2-hydroxyethyl)-L-cysteine (CYHA) (µg/g creatinine)
Never tobacco users	1653	1.82 (1.71, 1.93) #	1653	1.82 (1.71, 1.93) #	1653	1.82 (1.71, 1.93) #
0-4	111	8.27 (6.63, 10.32)	24	8.32 (5.49, 12.62)	6	3.49 (1.78, 6.85) #
5-9	305	16.80 (14.17, 19.92)	83	19.52 (14.83, 25.70)	10	17.39 (6.39, 47.32)
10-14	474	28.27 (25.19, 31.73)	172	25.54 (21.95, 29.71)	26	31.62 (22.88, 43.71)
15-19	276	32.49 (25.29, 41.73)	112	37.51 (31.11, 45.21)	12	29.98 (17.95, 50.07)
20-24	560	39.21 (35.38, 43.45)	197	44.11 (37.09, 52.46)	38	27.16 (20.18, 36.56)
25-60	225	47.61 (42.33, 53.54)	60	48.79 (37.56, 63.38)	17	28.12 (17.07, 46.32)
All daily smokers	1951	28.94 (27.12, 30.89)	648	32.73 (29.71, 36.04)	109	25.18 (20.85, 30.41)
N-Acetyl-S-(2-cyanoethyl)-L-cysteine (CYMA) (µg/g creatinine)
Never tobacco users	1653	1.27 (1.19, 1.36)	1653	1.27 (1.19, 1.36)	1653	1.27 (1.19, 1.36)
0-4	111	46.98 (31.16, 70.83)	24	48.31 (30.20, 77.27)	6	6.03 (1.32, 27.65) *
5-9	305	103.06 (87.17, 121.85)	83	115.83 (93.60, 143.34)	10	94.98 (43.59, 206.96)
10-14	474	179.87 (160.60, 201.46)	172	153.58 (133.50, 176.68)	26	139.72 (114.48, 170.52)
15-19	276	213.27 (182.96, 248.61)	112	219.57 (183.71, 262.44)	12	162.34 (122.19, 215.68)
20-24	560	218.83 (201.97, 237.11)	197	246.04 (215.03, 281.52)	38	147.85 (109.78, 199.13)
25-60	225	306.41 (271.79, 345.43)	60	359.21 (307.82, 419.17)	17	224.59 (136.45, 369.68)
All daily smokers	1951	176.38 (164.66, 188.94)	648	194.79 (178.92, 212.07)	109	130.94 (107.27, 159.84)
N-Acetyl-S-(3,4-dihydroxybutyl)-L-cysteine (DHBMA) (µg/g creatinine)
Never tobacco users	1481	347.47 (335.69, 359.68)	1481	347.47 (335.69, 359.68)	1481	347.47 (335.69, 359.68)
0-4	100	388.88 (336.45, 449.47)	22	372.94 (330.94, 420.27)	6	299.44 (270.95, 330.94)
5-9	265	409.07 (387.08, 432.31)	78	464.47 (421.11, 512.29)	9	454.00 (329.62, 625.30)
10-14	422	514.11 (481.42, 549.02)	162	516.56 (487.54, 547.31)	23	381.65 (270.53, 538.41)
15-19	250	528.85 (482.98, 579.08)	109	533.69 (488.06, 583.59)	12	432.42 (392.26, 476.69)
20-24	498	563.32 (534.08, 594.16)	191	606.66 (563.74, 652.85)	33	430.46 (353.46, 524.25)
25-60	202	725.48 (666.78, 789.36)	56	711.80 (661.05, 766.44)	16	595.97 (430.80, 824.48)
All daily smokers	1737	524.68 (507.95, 541.96)	618	552.98 (531.06, 575.82)	99	434.89 (380.36, 497.24)
N-Acetyl-S-(2-carbamoyl-2-hydroxyethyl)-L-cysteine (GAMA) (µg/g creatinine)
Never tobacco users	1581	8.58 (8.10, 9.09) #	1581	8.58 (8.10, 9.09) #	1581	8.58 (8.10, 9.09) #
0-4	103	13.56 (11.44, 16.08) #	23	12.43 (9.90, 15.60)	6	9.97 (7.26, 13.70) #
5-9	289	14.33 (13.03, 15.75)	78	16.93 (14.62, 19.61)	10	15.94 (10.46, 24.28)
10-14	451	18.53 (17.40, 19.74)	156	17.71 (16.13, 19.44)	24	17.65 (15.03, 20.73) #
15-19	257	21.02 (18.38, 24.03)	104	20.38 (18.06, 23.00)	12	19.45 (14.46, 26.15)
20-24	526	20.36 (19.00, 21.82)	189	22.03 (20.05, 24.20)	35	15.56 (12.23, 19.8)
25-60	209	23.92 (21.88, 26.15)	57	23.52 (20.12, 27.51)	15	19.17 (14.21, 25.86)
All daily smokers	1835	18.85 (18.17, 19.55)	607	19.77 (18.70, 20.89)	102	16.67 (14.67, 18.94)
N-Acetyl-S-(2-hydroxyethyl)-L-cysteine (HEMA) (µg/g creatinine)
Never tobacco users	1508	0.96 (0.89, 1.04) * #	1508	0.96 (0.89, 1.04) * #	1508	0.96 (0.89, 1.04) * #
0-4	97	1.33 (0.96, 1.84) *	23	1.79 (1.27, 2.51)	6	0.79 (0.48, 1.28) * #
5-9	262	2.29 (1.89, 2.79)	78	2.88 (2.19, 3.79)	9	2.13 (1.14, 4.00) *
10-14	409	3.50 (3.09, 3.96)	151	3.05 (2.57, 3.63)	25	2.19 (1.51, 3.17)
15-19	245	3.18 (2.52, 4.01)	103	4.21 (3.48, 5.10)	11	2.90 (2.06, 4.08)
20-24	482	3.73 (3.37, 4.13)	181	4.62 (3.85, 5.54)	30	2.63 (2.05, 3.36)
25-60	190	4.73 (4.00, 5.58)	56	4.64 (3.40, 6.33)	17	2.88 (1.82, 4.56)
All daily smokers	1685	3.21 (2.99, 3.45)	592	3.78 (3.41, 4.18)	98	2.38 (2.02, 2.81)
N-Acetyl-S-(2-hydroxypropyl)-L-cysteine (2HPMA) (µg/g creatinine)
Never tobacco users	1605	32.20 (29.21, 35.48)	1605	32.20 (29.21, 35.48)	1605	32.20 (29.21, 35.48)
0-4	110	42.84 (35.94, 51.07)	24	56.66 (30.69, 104.62)	6	25.93 (23.34, 28.81)
5-9	304	56.84 (47.38, 68.18)	83	69.65 (56.53, 85.81)	10	71.48 (32.51, 157.16)
10-14	467	76.74 (70.87, 83.10)	172	77.04 (68.01, 87.27)	26	69.4 (54.55, 88.30)
15-19	275	78.16 (66.97, 91.22)	110	94.23 (80.78, 109.91)	11	90.72 (64.68, 127.25)
20-24	555	96.64 (89.67, 104.15)	197	109.96 (93.58, 129.20)	38	68.43 (54.79, 85.46)
25-60	225	118.48 (102.70, 136.68)	60	145.41 (119.78, 176.53)	17	86.25 (56.95, 130.61)
All daily smokers	1936	79.88 (75.94, 84.02)	646	93.65 (85.84, 102.16)	108	70.33 (61.75, 80.10)
N-Acetyl-S-(3-hydroxypropyl)-L-cysteine (3HPMA or HPMA) (µg/g creatinine)
Never tobacco users	1653	261.73 (247.18, 277.13)	1653	261.73 (247.18, 277.13)	1653	261.73 (247.18, 277.13)
0-4	110	604.78 (509.87, 717.36)	24	477.01 (354.06, 642.66)	6	246.89 (190.60, 319.79)
5-9	301	746.81 (620.88, 898.29)	83	953.00 (790.29, 1149.22)	10	1128.29 (715.74, 1778.64)
10-14	466	1357.84 (1225.63, 1504.03)	172	1231.16 (1096.02, 1382.97)	25	1093.16 (891.71, 1340.14)
15-19	273	1550.18 (1383.86, 1736.49)	111	1634.81 (1366.15, 1956.29)	11	1215.16 (1047.12, 1410.17)
20-24	553	1727.8 (1584.74, 1883.78)	196	2096.29 (1824.04, 2409.17)	37	1163.48 (921.17, 1469.53)
25-60	222	2566.52 (2234.33, 2948.10)	60	2880.50 (2451.94, 3383.97)	17	1809.66 (1230.85, 2660.65)
All daily smokers	1925	1388.98 (1299.67, 1484.42)	646	1582.81 (1457.69, 1718.67)	106	1143.82 (970.45, 1348.17)
N-Acetyl-S-(3-hydroxypropyl-1-methyl)-L-cysteine (HPMMA) (µg/g creatinine)
Never tobacco users	1653	440.95 (416.42, 466.92)	1653	440.95 (416.42, 466.92)	1653	440.95 (416.42, 466.92)
0-4	111	1046.95 (898.17, 1220.37)	24	873.44 (630.20, 1210.58)	6	481.82 (341.30, 680.18)
5-9	305	1585.28 (1352.98, 1857.47)	83	1966.91 (1584.12, 2442.21)	10	2310.51 (1329.37, 4015.77)
10-14	474	2863.18 (2601.79, 3150.83)	172	2568.24 (2286.69, 2884.46)	26	2267.42 (1593.60, 3226.14)
15-19	276	3350.71 (2995.14, 3748.48)	112	3469.39 (2966.35, 4057.73)	12	2632.77 (2192.42, 3161.57)
20-24	560	3703.77 (3401.59, 4032.79)	197	4319.38 (3839.91, 4858.72)	38	2445.36 (1882.27, 3176.89)
25-60	225	5051.86 (4558.55, 5598.54)	60	5827.93 (5108.99, 6648.05)	17	3550.27 (2435.37, 5175.57)
All daily smokers	1951	2902.81 (2722.73, 3094.79)	648	3276.22 (3038.10, 3533.02)	109	2366.77 (1994.47, 2808.55)
N-Acetyl-S-(4-hydroxy-2-methyl-2-buten-1-yl)-L-cysteine (IPMA3) (µg/g creatinine)
Never tobacco users	1637	3.25 (3.04, 3.46)	1637	3.25 (3.04, 3.46)	1637	3.25 (3.04, 3.46)
0-4	111	11.76 (9.14, 15.15)	24	11.99 (7.69, 18.69)	4	4.63 (1.79, 11.99) *
5-9	304	25.01 (21.43, 29.19)	83	31.09 (23.18, 41.71)	10	42.61 (25.53, 71.13)
10-14	473	45.96 (39.45, 53.55)	171	40.53 (34.89, 47.07)	26	42.24 (34.61, 51.56)
15-19	276	53.30 (48.37, 58.74)	112	55.59 (47.30, 65.33)	12	42.38 (33.24, 54.04)
20-24	560	58.29 (52.97, 64.15)	197	70.06 (60.17, 81.56)	38	37.06 (27.38, 50.16)
25-60	225	76.18 (67.07, 86.53)	60	89.61 (75.01, 107.07)	17	49.83 (29.14, 85.24)
All daily smokers	1949	44.86 (41.86, 48.08)	647	51.99 (47.44, 56.98)	107	38.59 (31.55, 47.21)
Mandelic acid (MA) (µg/g creatinine)
Never tobacco users	1464	128.06 (122.44, 133.94)	1464	128.06 (122.44, 133.94)	1464	128.06 (122.44, 133.94)
0-4	104	185.54 (155.31, 221.64)	24	206.99 (179.96, 238.08)	4	169.85 (92.54, 311.72)
5-9	279	230.35 (210.94, 251.53)	76	230.54 (194.15, 273.75)	9	245.62 (129.78, 464.86)
10-14	428	295.57 (276.81, 315.59)	165	281.96 (258.08, 308.04)	24	288.78 (238.87, 349.12)
15-19	257	334.09 (303.94, 367.24)	109	312.08 (274.04, 355.41)	11	263.22 (188.82, 366.94)
20-24	512	339.02 (320.88, 358.18)	189	377.67 (341.11, 418.15)	35	251.79 (208.47, 304.12)
25-60	202	411.63 (371.10, 456.60)	58	407.59 (371.09, 447.68)	17	325.96 (233.86, 454.33)
All daily smokers	1782	304.8 (294.15, 315.85)	621	317.00 (299.28, 335.76)	100	270.15 (238.67, 305.78)
2-Methylhippuric acid (2MHA) (µg/g creatinine)
Never tobacco users	1589	22.26 (20.62, 24.03)	1589	22.26 (20.62, 24.03)	1589	22.26 (20.62, 24.03)
0-4	107	60.06 (38.60, 93.46)	23	51.28 (35.38, 74.31)	6	35.27 (31.04, 40.08)
5-9	301	71.27 (63.13, 80.46)	79	89.42 (73.72, 108.45)	10	115.89 (59.18, 226.94)
10-14	464	121.82 (110.55, 134.24)	162	102.02 (88.77, 117.26)	26	126.4 (94.62, 168.86)
15-19	274	144.99 (127.26, 165.19)	107	130.67 (110.09, 155.10)	12	123.27 (95.67, 158.83)
20-24	544	142.1 (128.64, 156.96)	192	167.97 (146.13, 193.07)	37	113.37 (84.57, 151.96)
25-60	222	176.45 (160.60, 193.87)	57	200.55 (172.93, 232.59)	17	138.67 (89.62, 214.55)
All daily smokers	1912	120.36 (113.16, 128.01)	620	129.82 (120.26, 140.14)	108	114.97 (98.01, 134.86)
3-and 4-Methylhippuric acid (3MHA + 4MHA) (µg/g creatinine)
Never tobacco users	1651	152.33 (143.74, 161.43)	1651	152.33 (143.74, 161.43)	1651	152.33 (143.74, 161.43)
0-4	110	371.67 (263.58, 524.09)	24	323.69 (233.82, 448.10)	6	200.03 (150.69, 265.52)
5-9	305	488.99 (423.41, 564.72)	83	585.02 (494.47, 692.14)	10	601.84 (296.77, 1220.49)
10-14	474	791.93 (728.61, 860.75)	172	745.07 (660.92, 839.92)	26	807.35 (655.70, 994.07)
15-19	276	928.82 (824.11, 1046.83)	112	906.45 (797.27, 1030.58)	12	795.68 (670.61, 944.09)
20-24	560	964.96 (889.59, 1046.71)	197	1136.19 (1014.33, 1272.69)	38	765.52 (597.27, 981.15)
25-60	225	1233.51 (1144.72, 1329.20)	60	1349.2 (1172.19, 1552.96)	17	838.26 (513.78, 1367.67)
All daily smokers	1950	802.83 (757.96, 850.37)	648	891.53 (835.67, 951.12)	109	728.55 (636.94, 833.34)
N-Acetyl-S-(4-hydroxy-2-buten-1-yl)-L-cysteine (MHBMA3) (µg/g creatinine)
Never tobacco users	1653	4.44 (4.24, 4.64)	1653	4.44 (4.24, 4.64)	1653	4.44 (4.24, 4.64)
0-4	111	13.52 (11.40, 16.04)	24	13.89 (10.40, 18.53)	6	5.99 (4.14, 8.69)
5-9	305	21.26 (18.37, 24.61)	83	25.23 (20.00, 31.83)	10	33.72 (22.08, 51.50)
10-14	474	35.28 (31.23, 39.85)	172	31.05 (27.09, 35.59)	26	29.55 (23.36, 37.38)
15-19	276	37.61 (33.39, 42.36)	112	43.02 (37.35, 49.57)	12	31.12 (25.97, 37.29)
20-24	560	43.13 (39.90, 46.62)	197	52.09 (44.71, 60.67)	38	28.37 (22.48, 35.80)
25-60	225	52.45 (47.96, 57.35)	60	62.13 (53.80, 71.75)	17	36.5 (23.95, 55.63)
All daily smokers	1951	34.53 (32.64, 36.53)	648	39.82 (36.59, 43.34)	109	28.34 (24.49, 32.79)
Phenylglyoxylic acid (PGA) (µg/g creatinine)
Never tobacco users	1550	202.54 (194.48, 210.93)	1550	202.54 (194.48, 210.93)	1550	202.54 (194.48, 210.93)
0-4	105	231.99 (199.24, 270.12)	24	278.57 (230.14, 337.19)	5	245.51 (215.64, 279.51)
5-9	289	319.2 (291.73, 349.25)	80	359.88 (311.80, 415.39)	10	336.14 (223.29, 506.02)
10-14	452	397.14 (368.09, 428.49)	164	410.5 (379.40, 444.14)	25	362.82 (266.25, 494.42)
15-19	259	443.91 (405.46, 485.99)	109	436.37 (358.90, 530.56)	11	458.81 (370.95, 567.49)
20-24	526	441.85 (410.44, 475.68)	187	507.66 (464.32, 555.03)	37	357.49 (289.19, 441.91)
25-60	215	537.58 (496.61, 581.93)	56	581.76 (527.91, 641.11)	17	390.08 (273.50, 556.35)
All daily smokers	1846	404.44 (388.94, 420.56)	620	447.06 (425.60, 469.61)	105	366.67 (321.79, 417.81)
N-Acetyl-S-(phenyl)-L-cysteine (PMA) (µg/g creatinine)
Never tobacco users	1653	1.01 (0.94, 1.08) *	1653	1.01 (0.94, 1.08) *	1653	1.01 (0.94, 1.08) *
0-4	111	0.83 (0.62, 1.11) *	24	0.97 (0.65, 1.44) *	6	1.07 (0.60, 1.92) *
5-9	305	0.95 (0.84, 1.07) *	83	0.99 (0.80, 1.23) *	10	1.33 (0.90, 1.96) #
10-14	474	1.09 (1.00, 1.19) *	172	1.08 (0.95, 1.22) *	26	0.97 (0.77, 1.23) *
15-19	276	1.08 (0.97, 1.20) *	112	1.00 (0.87, 1.15) *	12	0.82 (0.73, 0.92) *
20-24	560	1.27 (1.16, 1.38)	197	1.10 (1.00, 1.22) *	38	1.01 (0.80, 1.28) *
25-60	225	1.26 (1.13, 1.42)	60	1.20 (1.00, 1.44) * #	17	1.15 (0.79, 1.69) *
All daily smokers	1951	1.11 (1.06, 1.17)	648	1.07 (1.01, 1.13) *	109	1.02 (0.92, 1.13) *
2-Thioxothiazolidine-4-carboxylic acid (TTCA) (µg/g creatinine)
Never tobacco users	1369	20.66 (18.34, 23.28)	1369	20.66 (18.34, 23.28)	1369	20.66 (18.34, 23.28)
0-4	96	17.44 (13.17, 23.10)	22	12.66 (9.27, 17.30)	5	21.65 (7.54, 62.21)
5-9	267	19.12 (15.88, 23.04)	81	22.2 (16.99, 29.00)	10	34.49 (17.57, 67.68)
10-14	415	24.75 (21.44, 28.57)	161	22.21 (18.59, 26.52)	24	17.75 (11.94, 26.40)
15-19	247	23.87 (18.52, 30.78)	101	26.33 (20.07, 34.56)	12	16.04 (11.00, 23.39)
20-24	489	20.02 (17.33, 23.12)	179	21.98 (19.36, 24.95)	35	15.97 (10.92, 23.37)
25-60	189	25.97 (23.25, 28.99)	57	31.65 (24.48, 40.94)	17	25.37 (15.20, 42.35)
All daily smokers	1703	21.92 (20.45, 23.51)	601	23.36 (21.35, 25.56)	103	18.96 (15.08, 23.85)
* - Relative standard error > 30%
# - More than 40% of values were below the Limit of Detection

## Sheet: Metals
Biomarker CPD	Exclusive cigarette smokers		Dual cigarette and e-cigarette users		Dual cigarette and smokeless tobacco users
	n	GM (95% CI)	n	GM (95% CI)	n	GM (95% CI)
Beryllium (µg/g creatinine)
Never tobacco users	1653	0.01 (0.01, 0.01) #	1653	0.01 (0.01, 0.01) #	1653	0.01 (0.01, 0.01) #
0-4	111	0.01 (0.01, 0.01) #	24	0.01 (0.01, 0.01) #	6	0.01 (0.01, 0.03) #
5-9	303	0.01 (0.01, 0.01) #	83	0.01 (0.01, 0.01) #	10	0.01 (0.01, 0.03) #
10-14	473	0.01 (0.01, 0.01) #	172	0.01 (0.01, 0.01) #	27	0.01 (0.01, 0.02) #
15-19	275	0.01 (0.01, 0.01) #	112	0.01 (0.01, 0.02) #	12	0.01 (0.01, 0.02) #
20-24	558	0.01 (0.01, 0.01) #	196	0.01 (0.01, 0.02) #	38	0.01 (0.01, 0.01) #
25-60	224	0.02 (0.01, 0.02) #	60	0.02 (0.01, 0.02) #	17	0.01 (0.01, 0.02) #
All daily smokers	1944	0.01 (0.01, 0.01) #	647	0.01 (0.01, 0.01) #	110	0.01 (0.01, 0.01) #
Cadmium (µg/g creatinine)
Never tobacco users	1652	0.15 (0.14, 0.16)	1652	0.15 (0.14, 0.16)	1652	0.15 (0.14, 0.16)
0-4	111	0.23 (0.18, 0.29)	24	0.13 (0.09, 0.19)	6	0.14 (0.05, 0.38) #
5-9	303	0.20 (0.17, 0.23)	83	0.21 (0.17, 0.26)	10	0.13 (0.06, 0.29)
10-14	473	0.29 (0.26, 0.33)	172	0.24 (0.21, 0.28)	27	0.14 (0.11, 0.19)
15-19	275	0.29 (0.25, 0.34)	112	0.30 (0.23, 0.41)	12	0.2 (0.11, 0.38)
20-24	558	0.37 (0.33, 0.42)	196	0.37 (0.32, 0.43)	38	0.15 (0.11, 0.20)
25-60	224	0.53 (0.46, 0.61)	60	0.50 (0.42, 0.59)	17	0.35 (0.21, 0.59)
All daily smokers	1944	0.31 (0.29, 0.33)	647	0.30 (0.28, 0.33)	110	0.17 (0.14, 0.22)
Cobalt (µg/g creatinine)
Never tobacco users	1653	0.56 (0.54, 0.59)	1653	0.56 (0.54, 0.59)	1653	0.56 (0.54, 0.59)
0-4	111	0.47 (0.40, 0.55)	24	0.52 (0.42, 0.64)	6	0.42 (0.31, 0.59)
5-9	303	0.50 (0.45, 0.55)	83	0.58 (0.51, 0.66)	10	0.50 (0.39, 0.63)
10-14	473	0.54 (0.50, 0.59)	172	0.55 (0.51, 0.60)	27	0.43 (0.35, 0.52)
15-19	275	0.54 (0.47, 0.62)	112	0.69 (0.56, 0.83)	12	0.53 (0.40, 0.68)
20-24	558	0.56 (0.53, 0.60)	196	0.58 (0.52, 0.65)	37	0.46 (0.39, 0.55)
25-60	224	0.65 (0.59, 0.71)	60	0.66 (0.59, 0.73)	17	0.45 (0.34, 0.60)
All daily smokers	1944	0.55 (0.53, 0.57)	647	0.60 (0.56, 0.64)	109	0.46 (0.43, 0.50)
Lead (µg/g creatinine)
Never tobacco users	1653	0.35 (0.33, 0.37)	1653	0.35 (0.33, 0.37)	1653	0.35 (0.33, 0.37)
0-4	111	0.50 (0.40, 0.63)	24	0.39 (0.31, 0.50)	6	0.47 (0.30, 0.75) *
5-9	303	0.39 (0.34, 0.44)	83	0.46 (0.38, 0.56)	10	0.31 (0.23, 0.42)
10-14	473	0.47 (0.43, 0.51)	172	0.45 (0.41, 0.50)	27	0.43 (0.33, 0.56)
15-19	275	0.51 (0.47, 0.57)	112	0.50 (0.42, 0.59)	12	0.56 (0.32, 1.00) *
20-24	558	0.52 (0.49, 0.56)	196	0.56 (0.49, 0.62)	38	0.46 (0.37, 0.57)
25-60	224	0.62 (0.56, 0.69)	60	0.67 (0.55, 0.81)	17	0.64 (0.34, 1.20) *
All daily smokers	1944	0.49 (0.47, 0.52)	647	0.51 (0.48, 0.54)	110	0.47 (0.41, 0.54)
Manganese (µg/g creatinine)
Never tobacco users	1652	0.13 (0.12, 0.14) #	1652	0.13 (0.12, 0.14) #	1652	0.13 (0.12, 0.14) #
0-4	111	0.17 (0.12, 0.22) #	24	0.11 (0.09, 0.15) #	6	0.10 (0.06, 0.16) #
5-9	303	0.12 (0.11, 0.13) #	83	0.18 (0.13, 0.23) #	10	0.15 (0.10, 0.24) #
10-14	473	0.14 (0.13, 0.16) #	172	0.14 (0.13, 0.17) #	27	0.14 (0.09, 0.20) #
15-19	275	0.14 (0.12, 0.16) #	112	0.14 (0.12, 0.17) #	12	0.13 (0.11, 0.16) #
20-24	558	0.14 (0.12, 0.16) #	196	0.17 (0.14, 0.20) #	38	0.12 (0.09, 0.16) #
25-60	223	0.16 (0.13, 0.18) #	60	0.20 (0.16, 0.25) #	17	0.15 (0.10, 0.22) #
All daily smokers	1943	0.14 (0.13, 0.15) #	647	0.16 (0.15, 0.17) #	110	0.13 (0.12, 0.15) #
Strontium (µg/g creatinine)
Never tobacco users	1653	112.71 (106.78, 118.97)	1653	112.71 (106.78, 118.97)	1653	112.71 (106.78, 118.97)
0-4	111	110.76 (96.42, 127.22)	24	128.71 (98.20, 168.68)	6	135.72 (94.27, 195.39)
5-9	303	115.26 (99.08, 134.1)	83	134.75 (113.85, 159.49)	10	123.97 (87.31, 176.00)
10-14	473	108.31 (94.25, 124.48)	172	119.64 (107.35, 133.33)	27	75.27 (43.84, 129.20)
15-19	274	109.39 (95.13, 125.78)	111	141.01 (123.27, 161.3)	12	112.89 (89.32, 142.67)
20-24	557	118.5 (107.57, 130.53)	194	131.97 (116.44, 149.56)	38	135.88 (113.75, 162.32)
25-60	224	120.65 (101.24, 143.79)	60	146.71 (114.76, 187.55)	17	136.85 (99.38, 188.46)
All daily smokers	1942	114.10 (107.12, 121.54)	644	132.05 (122.07, 142.84)	110	114.10 (94.77, 137.38)
Thallium (µg/g creatinine)
Never tobacco users	1652	0.17 (0.16, 0.18)	1652	0.17 (0.16, 0.18)	1652	0.17 (0.16, 0.18)
0-4	111	0.15 (0.13, 0.18)	24	0.15 (0.12, 0.19)	6	0.17 (0.10, 0.30)
5-9	303	0.15 (0.13, 0.16)	83	0.16 (0.14, 0.18)	10	0.18 (0.13, 0.25)
10-14	473	0.16 (0.15, 0.17)	172	0.16 (0.14, 0.17)	27	0.15 (0.12, 0.19)
15-19	275	0.17 (0.15, 0.18)	112	0.17 (0.15, 0.19)	12	0.13 (0.09, 0.18)
20-24	558	0.15 (0.14, 0.16)	196	0.16 (0.14, 0.17)	38	0.12 (0.11, 0.14)
25-60	224	0.15 (0.14, 0.17)	60	0.16 (0.14, 0.19)	17	0.12 (0.08, 0.18)
All daily smokers	1944	0.15 (0.15, 0.16)	647	0.16 (0.15, 0.17)	110	0.14 (0.12, 0.15)
Uranium (µg/g creatinine)
Never tobacco users	1653	0.01 (0.00, 0.01)	1653	0.01 (0.00, 0.01)	1653	0.01 (0.00, 0.01)
0-4	111	0.01 (0.01, 0.01)	24	0.01 (0.00, 0.01)	6	0.01 (0.00, 0.01)
5-9	303	0.01 (0.01, 0.01)	83	0.01 (0.01, 0.01)	10	0.01 (0.00, 0.01)
10-14	473	0.01 (0.01, 0.01)	172	0.01 (0.01, 0.01)	27	0.01 (0.00, 0.01)
15-19	275	0.01 (0.01, 0.01)	112	0.01 (0.01, 0.01)	12	0.01 (0.00, 0.01)
20-24	558	0.01 (0.01, 0.01)	196	0.01 (0.01, 0.01)	38	0.01 (0.01, 0.01)
25-60	224	0.01 (0.01, 0.01)	60	0.01 (0.01, 0.01)	17	0.01 (0.00, 0.01)
All daily smokers	1944	0.01 (0.01, 0.01)	647	0.01 (0.01, 0.01)	110	0.01 (0.01, 0.01)
* - Relative standard error > 30%
# - More than 40% of values were below the Limit of Detection

## Sheet: Arsenic
Biomarker CPD	Exclusive cigarette smokers		Dual cigarette and e-cigarette users		Dual cigarette and smokeless tobacco users
	n	GM (95% CI)	n	GM (95% CI)	n	GM (95% CI)
Arsenous acid (µg/g creatinine)
Never tobacco users	1653	0.33 (0.31, 0.36)	1653	0.33 (0.31, 0.36)	1653	0.33 (0.31, 0.36)
0-4	111	0.36 (0.29, 0.45)	24	0.34 (0.21, 0.57)	6	0.39 (0.21, 0.70) *
5-9	305	0.33 (0.26, 0.41)	83	0.26 (0.21, 0.33)	10	0.31 (0.15, 0.64) *
10-14	474	0.33 (0.29, 0.38)	171	0.26 (0.22, 0.3) #	27	0.35 (0.22, 0.53)
15-19	276	0.35 (0.31, 0.39)	112	0.26 (0.21, 0.32) #	12	0.35 (0.22, 0.56)
20-24	559	0.32 (0.28, 0.37)	197	0.23 (0.2, 0.27) #	38	0.35 (0.26, 0.47)
25-60	226	0.34 (0.27, 0.43)	60	0.24 (0.18, 0.33) #	17	0.32 (0.18, 0.54)
All daily smokers	1951	0.33 (0.31, 0.36)	647	0.25 (0.23, 0.27) #	110	0.34 (0.28, 0.41)
Arsenic acid (µg/g creatinine)
Never tobacco users	1653	0.53 (0.51, 0.57) #	1653	0.53 (0.51, 0.57) #	1653	0.53 (0.51, 0.57) #
0-4	111	0.53 (0.43, 0.65) #	24	0.44 (0.37, 0.53) #	6	0.53 (0.31, 0.93) * #
5-9	305	0.53 (0.47, 0.59) #	83	0.63 (0.52, 0.77) #	10	0.62 (0.31, 1.23) * #
10-14	474	0.65 (0.57, 0.73) #	171	0.64 (0.55, 0.74) #	27	0.62 (0.41, 0.93) * #
15-19	276	0.61 (0.5, 0.73) #	112	0.64 (0.54, 0.76) #	12	0.54 (0.41, 0.72) #
20-24	559	0.59 (0.54, 0.65) #	197	0.68 (0.56, 0.81) #	38	0.55 (0.42, 0.72) #
25-60	226	0.74 (0.63, 0.86) #	60	0.94 (0.76, 1.17) * #	17	0.67 (0.43, 1.04) * #
All daily smokers	1951	0.61 (0.58, 0.64) #	647	0.67 (0.62, 0.72) #	110	0.59 (0.52, 0.66) #
Dimethylarsinic acid (µg/g creatinine)
Never tobacco users	1653	3.69 (3.48, 3.92)	1653	3.69 (3.48, 3.92)	1653	3.69 (3.48, 3.92)
0-4	111	3.35 (2.76, 4.06)	24	3.38 (2.33, 4.92)	6	2.48 (1.93, 3.18)
5-9	305	2.96 (2.65, 3.3)	83	3.11 (2.62, 3.68)	10	2.8 (1.85, 4.25)
10-14	474	3.05 (2.77, 3.35)	171	3.11 (2.80, 3.45)	27	2.65 (2.08, 3.37)
15-19	276	3.09 (2.82, 3.39)	112	3.05 (2.62, 3.55)	12	2.38 (1.94, 2.92)
20-24	559	2.93 (2.73, 3.14)	197	3.21 (2.81, 3.66)	38	2.58 (2.09, 3.18)
25-60	226	3.22 (2.84, 3.64)	60	3.37 (2.76, 4.12) #	17	3.16 (1.96, 5.11)
All daily smokers	1951	3.04 (2.91, 3.18)	647	3.16 (2.98, 3.35)	110	2.67 (2.38, 2.98)
Monomethylarsonic acid (µg/g creatinine)
Never tobacco users	1653	0.48 (0.45, 0.52)	1653	0.48 (0.45, 0.52)	1653	0.48 (0.45, 0.52)
0-4	111	0.42 (0.36, 0.48)	24	0.33 (0.20, 0.55)	6	0.23 (0.14, 0.38) #
5-9	305	0.39 (0.34, 0.45)	83	0.36 (0.30, 0.44) #	10	0.27 (0.16, 0.44) #
10-14	474	0.4 (0.35, 0.44)	171	0.36 (0.32, 0.42) #	27	0.53 (0.39, 0.73)
15-19	276	0.46 (0.40, 0.53)	112	0.40 (0.34, 0.47) #	12	0.35 (0.24, 0.51)
20-24	559	0.46 (0.42, 0.50)	197	0.35 (0.3, 0.41) #	38	0.37 (0.30, 0.46)
25-60	226	0.43 (0.38, 0.47)	60	0.37 (0.28, 0.47) #	17	0.42 (0.25, 0.70) #
All daily smokers	1951	0.43 (0.40, 0.45)	647	0.37 (0.34, 0.39) #	110	0.39 (0.33, 0.46)
Total inorganic arsenic (µg/g creatinine)
Never tobacco users	1653	5.36 (5.08, 5.66)	1653	5.36 (5.08, 5.66)	1653	5.36 (5.08, 5.66)
0-4	111	4.92 (4.18, 5.79)	24	4.83 (3.39, 6.88)	6	3.80 (3.00, 4.81)
5-9	305	4.49 (4.05, 4.97)	83	4.61 (3.92, 5.42)	10	4.21 (2.73, 6.51)
10-14	474	4.70 (4.28, 5.17)	171	4.66 (4.22, 5.14)	27	4.44 (3.44, 5.71)
15-19	276	4.77 (4.37, 5.21)	112	4.65 (4.06, 5.34)	12	3.77 (3.07, 4.63)
20-24	559	4.58 (4.29, 4.89)	197	4.78 (4.18, 5.45)	38	4.15 (3.50, 4.93)
25-60	226	5.02 (4.48, 5.63)	60	5.20 (4.31, 6.29)	17	4.81 (3.07, 7.54)
All daily smokers	1951	4.69 (4.51, 4.89)	647	4.75 (4.49, 5.02)	110	4.26 (3.85, 4.71)
* - Relative standard error > 30%
# - More than 40% of values were below the Limit of Detection
